# Supplementary material for: Age-dependent microstructure alterations in 5xFAD mice by high-resolution diffusion tensor imaging
Source: Frontiers journal article supplement (doi:10.3389/fnins.2022.964654), 2022-08-17
Supplement: Image_1.pdf [file Image_1.pdf]

## Supporting Information

Additional supporting information may be found online in the Supporting Information section at the end of the article.

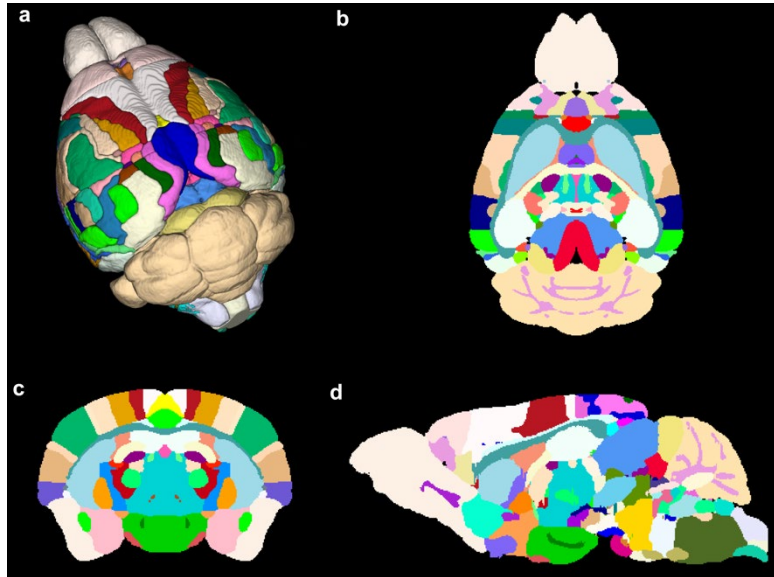

**Supporting Information Figure S1.** The parcellation of the mouse brain into 166 ROIs.

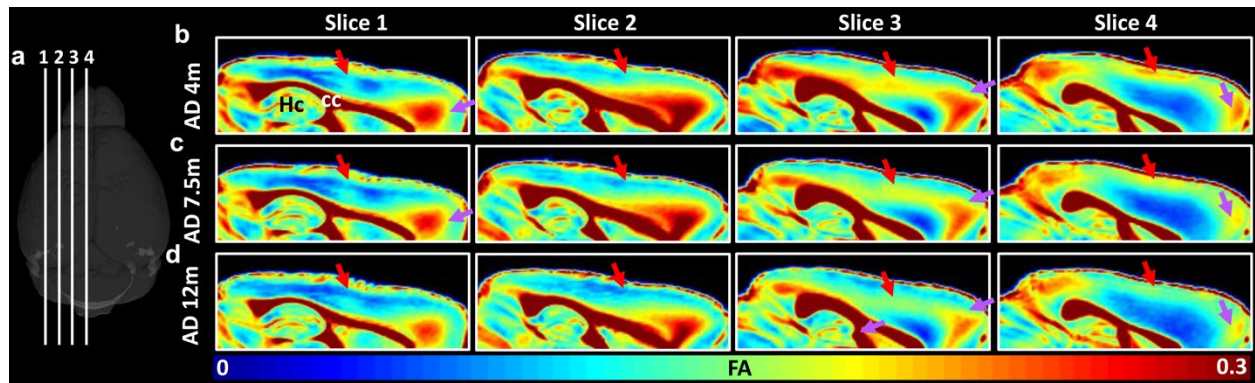

**Supporting Information Figure S2.** The representative slices showing the FA changes with age (4, 7.5, and 12 months) at cortex regions in 5xFAD mice.
